# Supplementary material for: Spray Drying of a Subcritical Extract Using Marrubium vulgare as a Method of Choice for Obtaining High Quality Powder
Source: MDPI journal article supplement (doi:10.3390/pharmaceutics11100523), 2019-10-11
Supplement: s1 [file s1]

# Supplementary Materials: Spray Drying of a Subcritical Extract Using *Marrubium Vulgare* as a Method of Choice for Obtaining High Quality Powder

Aleksandra Gavarić, Jelena Vladić, Rita Ambrus, Stela Jokić, Piroska Szabó-Révész, Milan Tomić, Marijana Blažić and Senka Vidović

**Table 1.** Flow character of powder expressed by Hausner ratio and Carr index.

| Hausner Ratio | Flow Character                  | CI (%) |
|---------------|---------------------------------|--------|
| 1.00–1.11     | Excellent/very free flow        | ≤10    |
| 1.12–1.18     | Good/free flow                  | 11–15  |
| 1.19–1.25     | Fair                            | 16–20  |
| 1.26–1.34     | Passable                        | 21–25  |
| 1.35–1.45     | Poor/cohesive                   | 26–31  |
| 1.46–1.59     | Very poor/very cohesive         | 32–37  |
| >1.60         | Extremely poor/approx. non-flow | >38    |

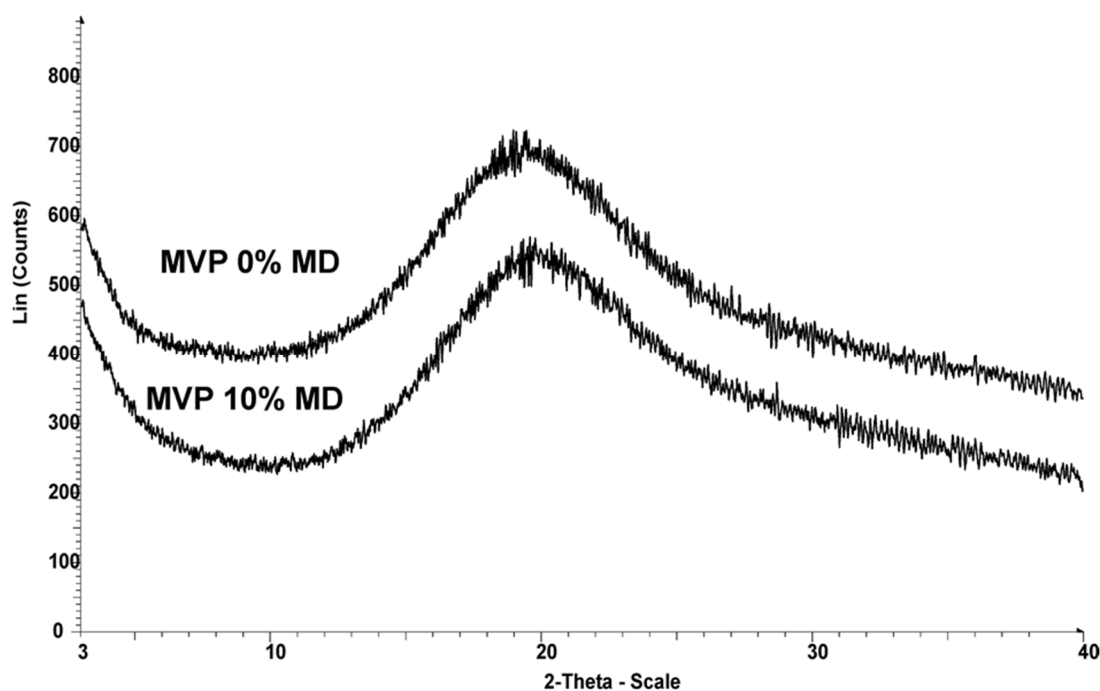

**Figure S1.** XRPD patterns of the MVP 0% MD and MVP 10% MD obtained after 6 months storage time
